# Supplementary material for: Global Mental Health Reforms: Mental Health Care in Anglophone West Africa
Source: Atypon-hosted journal article supplement (doi:10.1176/appi.ps.201300300), 2014-09-01
Supplement: 1084_ds001.pdf [file 1084_ds001.pdf]

Table 1: Distribution Mental Health Facilities and Mental Health Professionals in selected Anglophone countries of West Africa.

|                                                         | <b>LIBERIA<br/>(2012)</b> | <b>GAMBIA<br/>(2012)</b> | <b>S/LEONE<br/>(2012)</b> | <b>GHANA (2011)</b> | <b>NIGERIA (2010)</b> |
|---------------------------------------------------------|---------------------------|--------------------------|---------------------------|---------------------|-----------------------|
| <b>Population</b>                                       | 4,000,000                 | 2,000,000                | 6,000,000                 | 24,000,000          | 150,000,000           |
| <b>Psychiatric Hospitals</b>                            | 1                         | 1                        | 1                         | 3                   | 10                    |
| <b>General Hospital with<br/>Psychiatric Department</b> | 3                         | 1                        | 0                         | 10                  | 24                    |
| <b>Community-Based<br/>Mental Health Service</b>        | N/A                       | 1                        | 0                         | 4                   | 8                     |
| <b>Prisons with Mental<br/>Health Facilities</b>        | N/A                       | 1                        | 0                         | N/A                 | 16 <sup>±</sup>       |
| <b>Psychiatric nurses</b>                               | 5                         | 1                        | 2                         | 585                 | 1460                  |
| <b>Psychiatrists</b>                                    | 1                         | 3*                       | 1**                       | 7 (5**)             | 150                   |
| <b>Psychologist</b>                                     | 0                         | 0                        | 1                         | 3                   | 69                    |
| <b>Occupational therapists</b>                          | 2                         | 0                        | 1                         | 0                   | 35                    |
| <b>Social workers</b>                                   | N/A                       | 0                        | 0                         | 80                  | 114                   |
| <b>Psychiatrists per Million</b>                        | .6                        | .5                       | .3                        | .5                  | 1.0                   |

\*Expatriates on a 2-year contract.

\*\* Retired

±Services provided by visiting psychiatrists from neighboring hospitals.
